# Supplementary material
Source: PubMed Central journal article supplement (PMC1142611)
Supplement: 7600679s4.pdf [file 7600679s4.pdf]

**Supplementary data****Supplemental Table 1 Number of separated cells from the P-Sp region in each embryo**

|         | WT     | <i>Evi</i> <sup>+/+</sup> | <i>Evi</i> <sup>-/-</sup> |
|---------|--------|---------------------------|---------------------------|
| 1       | 14,168 | 14,929                    | 12,268                    |
| 2       | 20,195 | 19,199                    | 22,784                    |
| 3       | 16,653 | 16,775                    | 15,949                    |
| Average | 17,005 | 16,968                    | 17,000                    |
| SD      | 3,209  | 2,142                     | 5,336                     |

The P-Sp region from each embryo was isolated at E9.5 and counted the viable separated-cells. The viability is over 90% in each embryo.

**Supplemental Table 2 List of gene specific primers for RT-PCR**

| Gene   | Primer sequences (5'-3')<br>(Forward)<br>(Reverse)    | Size of products | No. of cycles |
|--------|-------------------------------------------------------|------------------|---------------|
| Evi1   | AATATGAGTCATGCCAACCC<br>CTTGGTGTACTGACATCATC          | 396              | 30 or 36      |
| GATA-2 | ACACACCACCCGATACCCACCTAT<br>CCTACGCCATGGCAGTCACCATGCT | 711              | 26 or 30      |
| GFP    | CTGACCCTGAAGTTCATCTGC<br>GCGGATCTTGAAGTTCACC          | 381              | 26            |
| GAPDH  | AATCCCATCACCATCTTCCA<br>CCAGGGGTCTTACTCCTTG           | 700              | 24            |

**Supplemental Table 3A Oligonucleotide sequences for D1-CONS like DNA binding sites used for EMSA**

| Name      | Position (nt.) | Sequences                                                     |
|-----------|----------------|---------------------------------------------------------------|
| D1-CONS   |                |                                                               |
| F         |                | 5'-CTAGCGACAAGATAAGATAAGGAGACAAGATAAGGATGACAAGATAAGATAAC-3'   |
| R         |                | 5'-TCGAGTTATCTTATCTTGTCACCTTATCTTATCTTGTCCTTATCTTATCTTGTCG-3' |
| a (3430F) | -6581 to -6554 | 5'-GAAAGGTCAGGATAGACAGACTGCAAAG-3'                            |
| (3430R)   |                | 5'-CTTTGCAGTCTGTCTATCCTGACCTTTC-3'                            |
| b (3884F) | -6127 to -6108 | 5'-ACAGTGGTGATGTCCATGTCCCTTTTATTT-3'                          |
| (3884R)   |                | 5'-AAATAAAAGGGACATGGACATCACCCTGT-3'                           |
| c (8543F) | -1468 to -1435 | 5'-TTAATACAATTGTCAGTAAGTATCCAGACACATT-3'                      |
| (8543R)   |                | 5'-AATGTGTCTGGATACTTACTGACAATTGTATTAA-3'                      |
| d (8721F) | -1290 to -1254 | 5'-CACTGATTAAGACATACTTATAGATAACCGACTGCCT-3'                   |
| (8721R)   |                | 5'-AGGCAGTCGGTATCTATAAGTATGTCCTTAATCAGTG-3'                   |

**Supplemental Table 3B. Oligonucleotide sequences for D2-CONS like DNA binding sites used for EMSA**

| Name      | Position (nt.)                                         | Sequences                                  |
|-----------|--------------------------------------------------------|--------------------------------------------|
| D2-CONS   |                                                        |                                            |
| D2-CONSF  | 5'-CTAGC <u>CTCATCTTC</u> GGACTCATCTTCGGTCTCATCTTCC-3' |                                            |
| D2-CONSR  | 5'-TCGAG <u>GAAGATGAG</u> ACCGAAGATGAGTCCGAAGATGAGG-3' |                                            |
| e (3987F) | -6024 to -5999                                         | 5'-TGATGCACTG <u>ATCTTC</u> GTGATGAGTC-3'  |
| (3987R)   |                                                        | 5'-GACTCATCAC <u>GAAGAT</u> CAGTGCATCA-3'  |
| f (3995F) | -6016 to -5991                                         | 5'-TGATCTTCGT <u>GATGAG</u> TCAGACCTGA-3'  |
| (3995R)   |                                                        | 5'-TCAGGTCTG <u>ACTCATC</u> ACGAAGATCA-3'  |
| g (5877F) | -4134 to -4109                                         | 5'-CCTGCCTGG <u>GATGAG</u> CTAATCCCGC-3'   |
| (5877R)   |                                                        | 5'-GCGGGATTAG <u>CTCATCT</u> CCAGGCAGG-3'  |
| h (6180F) | -3831 to -3806                                         | 5'-GTACAGCCAT <u>CTCATC</u> CTCACAGCCA-3'  |
| (6180R)   |                                                        | 5'-TGGCTGTGAG <u>GATGAG</u> ATGGCTGTAC-3'  |
| i (7023F) | -2988 to -2963                                         | 5'-GCTATTCATT <u>ATCTTC</u> GCCGGGAACA-3'  |
| (7023R)   |                                                        | 5'-TGTTCCCGG <u>CGAAGAT</u> AATGAATAGC-3'  |
| j (7320F) | -2685 to -2666                                         | 5'-CCTTGCTTT <u>ACTCATC</u> TGTTTTCTTT-3'  |
| (7320R)   |                                                        | 5'-AAAGAAAAC <u>GATGAG</u> TAAAGCAAGG-3'   |
| k (7657F) | -2354 to -2329                                         | 5'-CCTGCCTTCAG <u>GAAGAT</u> CAGATTGAGT-3' |
| (7657R)   |                                                        | 5'-ACTCAATCTG <u>ATCTTC</u> TGAAGGCAGG-3'  |
| l (7995F) | -2016 to -1991                                         | 5'-GGCTTATCAG <u>CTCATCT</u> CCCCCTCCC-3'  |
| (7995R)   |                                                        | 5'-GGGAGGGGG <u>GATGAG</u> CTGATAAGCC-3'   |

**Supplemental Table 4A List of primers for constructing the reporter plasmid**

| Name                      | Nucleotide position<br>(nt) | Sequences (5'-3')                        |
|---------------------------|-----------------------------|------------------------------------------|
| 5' <i>SacI</i> gata2US1.6 | -1740 to -1717              | <u>gagctc</u> GTGTCAACCCAAAGCAATAGCTCCG  |
| 5' <i>SacI</i> gata2US3.3 | -3326 to -3301              | <u>gagctc</u> GCACACTTACTCGCACACTCACATC  |
| 3' <i>BglII</i> gata2US   | -31 to -53                  | <u>agatct</u> GAACGCAAGCTCGTCGCGCAGGC    |
| 5' <i>SacI</i> gata2US7.0 | -7000 to -6977              | <u>gagctc</u> GCCTCTGGTCCTACACTAGGCCTT   |
| 3' <i>XhoI</i> gata2US7M  | -3327 to -3356              | <u>ctcgag</u> AAAGTTCACGTGTGCGAGACCCTG   |
| 5' <i>XhoI</i> gata2US7U  | -3332 to -3303              | <u>ctcgag</u> GCACACTTACTCGCACACTCACA    |
| D1MF                      |                             | TGCACACAGTGGTGATCTCCATGTCCCTTTTATTTACGG  |
| D1MR                      |                             | CCGTGAAATAAAAAGGGACATGGAGATCACCCTGTGTGCA |
| D2f-F                     |                             | TGATGCACTGATCTTCGTTATGAGTCAGACCTGACTGCA  |
| D2f-R                     |                             | ACTACGTGACTAGAAGCACTACTCAGTCTGGACTGACGT  |

Sequences with underline are shown to be restriction sites.

**Supplemental Table 4B List of PCR primers for chromatin immunoprecipitation**

| Binding site     | Name       | Sequences (5'-3')         |                                     |
|------------------|------------|---------------------------|-------------------------------------|
| GATA-2<br>(Up)   | 5ChIPup    | CTCACCTGCCCACCATTGTCT     | 35 cycles                           |
|                  | 3ChIPup    | GTGGCTAGAGGTACTGCCAGCAAGT | 94°C, 56°C and 72°C for 30 sec each |
| GATA-2<br>(D1-a) | 5ChIP3430  | GAGGAGGTTTCGCATAGGACCC    | 35 cycles                           |
|                  | 3ChIP3440  | TTGGAAAATGCTCAGTCATGTTAG  | 94°C, 55°C and 72°C for 30 sec each |
| GATA-2<br>(D1-b) | 5ChIP38840 | CCTCTGCCTCTCTGCCTCTGCCTC  | 35 cycles                           |
|                  | 3ChIP38840 | GCA TGTTTTCTAATATCCAGGCCT | 94°C, 65°C and 72°C for 30 sec each |
| GATA-2<br>(Down) | 5ChIPdown  | GCTGCAGGGGAGGAGCGGTC      | 35 cycles                           |
|                  | 3ChIPdown  | CAGCCAGCCCGCCGCCGAGGTC    | 94°C, 65°C and 72°C for 30 sec each |
| b-actin          | 5ACTB      | GCTTCTTGTCACCACCTCAA      | 35 cycles                           |
|                  | 3ACTB      | GGGAAGACCCTGTCCTTGTC      | 94°C, 55°C and 72°C for 30 sec each |
